# Supplementary material
Source: Springer Nature journal article supplement (https://www.springermedizin.de/resource/supplementary/12936_2007_467_MOESM4_ESM.pdf/9547512)

a)

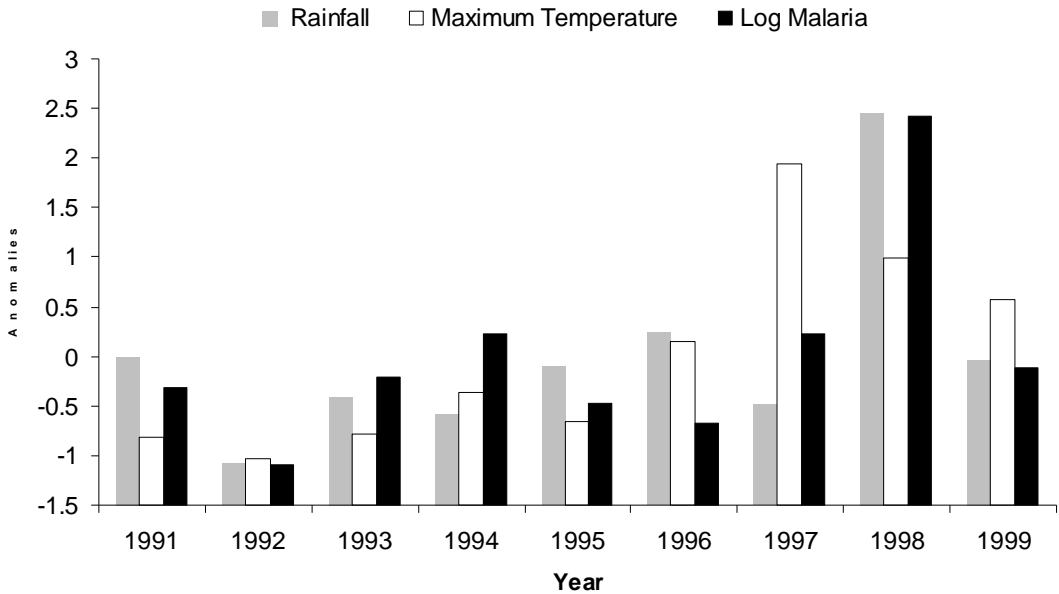

b)

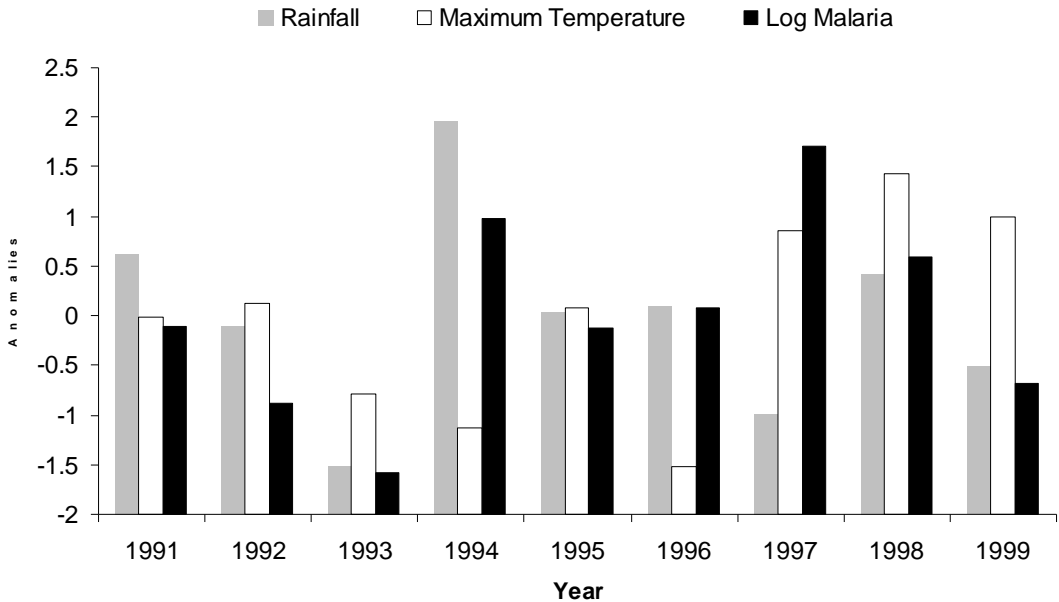

Supplement: MOESM4 [file 9547512]
